# Supplementary material for: Atypical chemokine receptor 4 shapes activated B cell fate
Source: PubMed Central journal article supplement — J Exp Med. 2018 Mar 5;215(3):801–13. doi: 10.1084/jem.20171067 (PMC5839757; doi:10.1084/jem.20171067), 2018-03-05
Supplement: JEM_20171067_sm.pdf [file JEM_20171067_sm.pdf]

## SUPPLEMENTAL MATERIAL

Kara et al., <https://doi.org/10.1084/jem.20171067>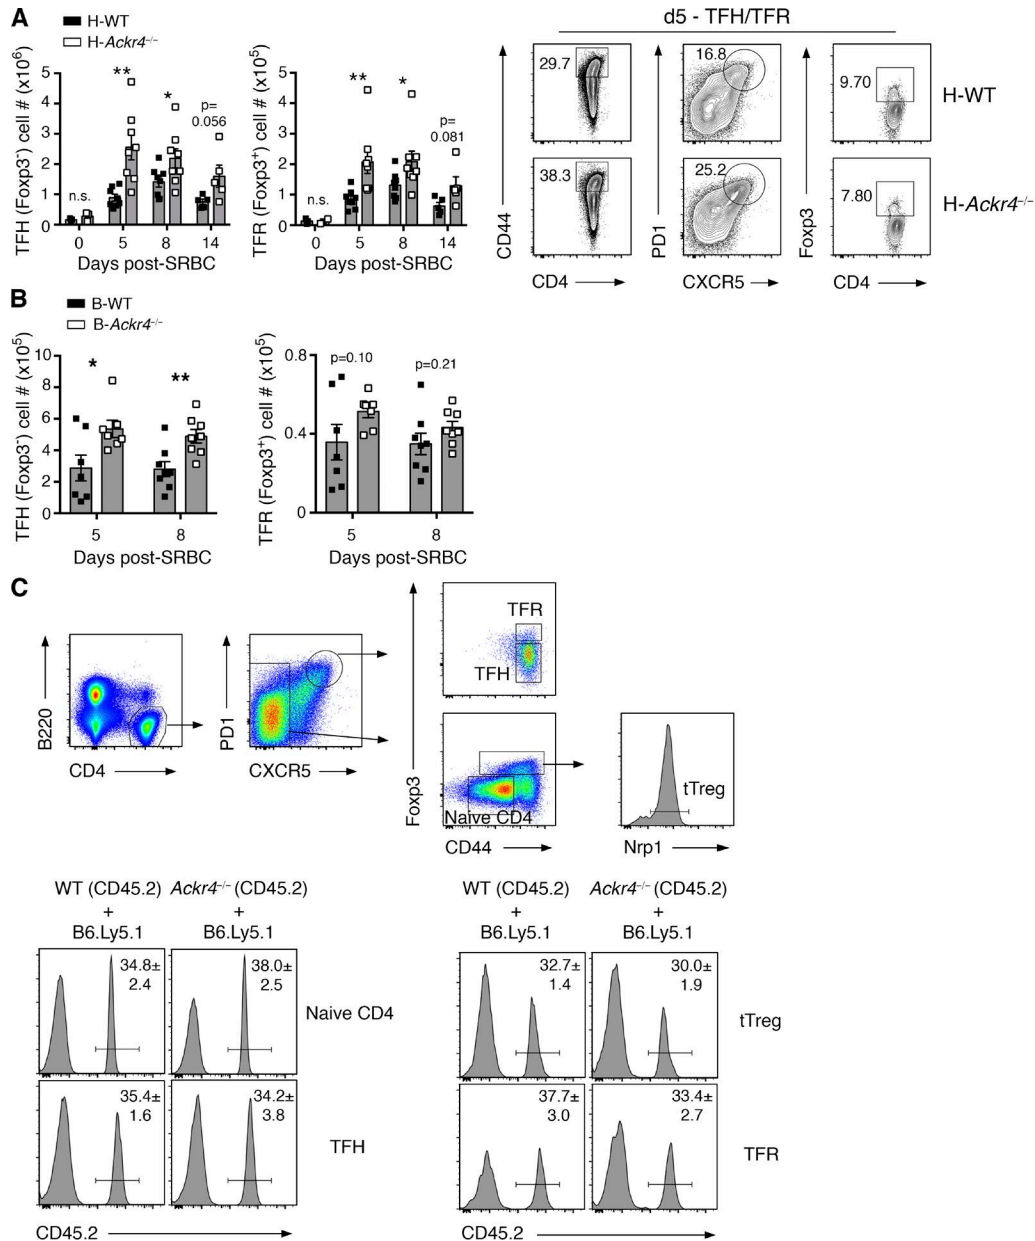

Figure S1. **Follicular T cell responses are enhanced in the absence of B cell ACKR4 (related to Figs. 1 and 3 A).** (A) TFH (B220<sup>-</sup>CD4<sup>+</sup>CD44<sup>hi</sup>PD1<sup>hi</sup>CXCR5<sup>hi</sup>Foxp3<sup>+</sup>) and TFR (B220<sup>-</sup>CD4<sup>+</sup>CD44<sup>hi</sup>PD1<sup>hi</sup>CXCR5<sup>hi</sup>Foxp3<sup>+</sup>) cell numbers in spleen of H-WT and H-Ackr4<sup>-/-</sup> mice after SRBC immunization as described in Fig. 1 (C and D; means  $\pm$  SEM). Representative plots are from day 5 after SRBC immunization. Data were analyzed using a two-tailed, unpaired Student's *t* test or a two-tailed, nonparametric Mann-Whitney test. (B) TFH and TFR cell numbers in B-WT and B-Ackr4<sup>-/-</sup> mice described in Fig. 1 (E and F; means  $\pm$  SEM). Data were analyzed using a two-tailed, unpaired Student's *t* test or a two-tailed, nonparametric Mann-Whitney test, as appropriate. (C) Representative flow-cytometric gating strategy identifying naive CD4<sup>+</sup> T cells, thymic-derived T regulatory (tTreg) cells, TFH, and TFR cells in mixed BM chimeras, as described in Fig. 3 A. Left: Representative histograms of CD45.2<sup>+</sup> cells among concurrent naive CD4<sup>+</sup> T cell and TFH compartments. Right: Representative histograms of CD45.2<sup>+</sup> cells among concurrent tTreg cell and TFR compartments. Numbers in plots indicate means  $\pm$  SEM frequencies of CD45.2<sup>+</sup> cells among indicated cell populations (*n* = 6 mice/group). Data are representative of two independent experiments.

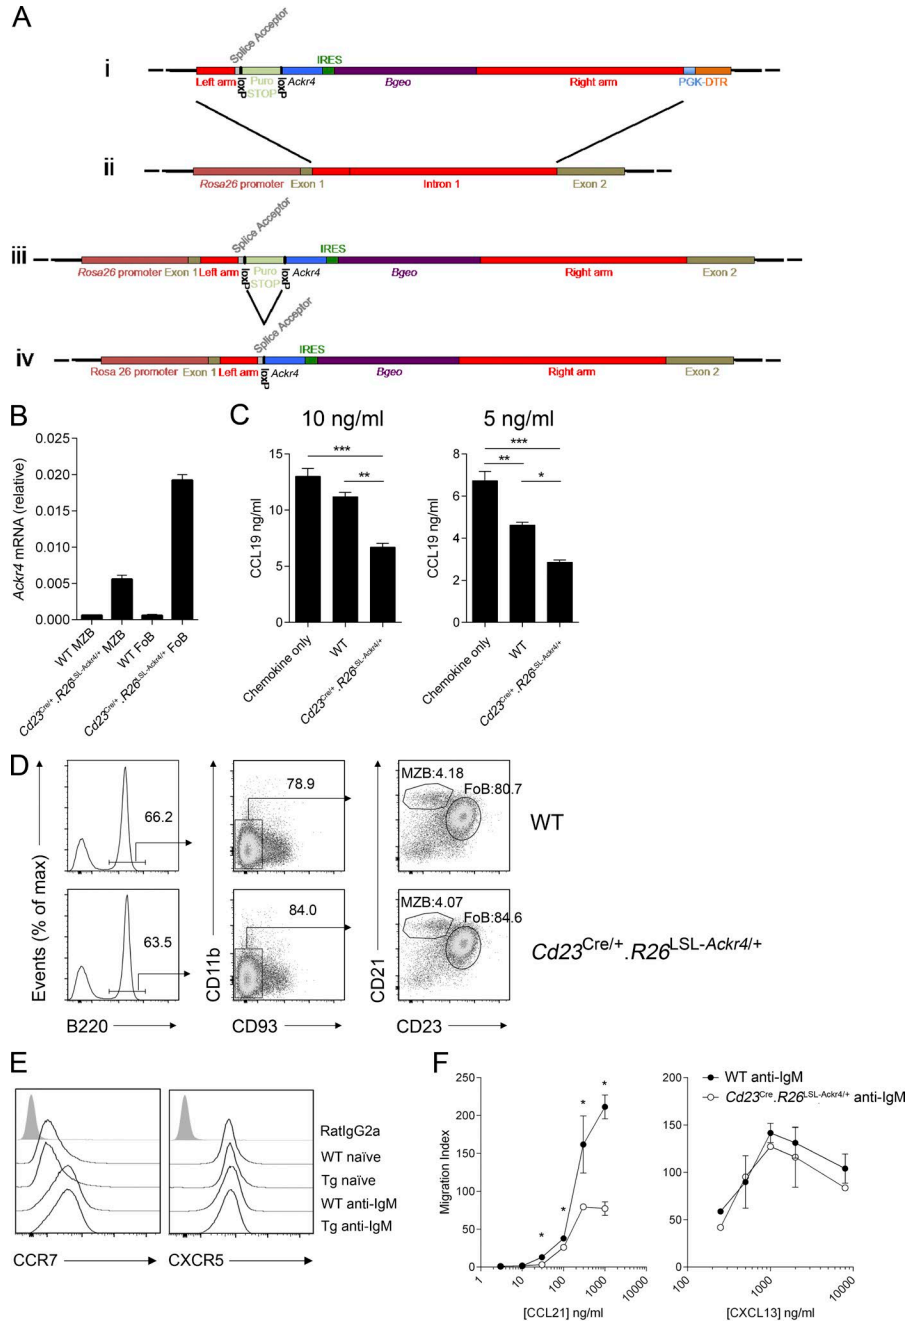

Figure S2. *Cd23<sup>Cre/+</sup>.Rosa26<sup>LSL-Ackr4/+</sup>* mice (related to Fig. 3 C). **(A)** Rosa26 targeting strategy. (i) *Rosa26<sup>LSL-Ackr4</sup>* targeting construct; (ii) WT *Rosa26* locus; (iii) targeted *Rosa26* locus; and (iv) targeted *Rosa26* locus after *Cd23-Cre*-mediated recombination. loxP:loxP, targets for Cre-mediated recombination; Puro-STOP, puromycin resistance gene, followed by STOP cassette (transcriptional pause sequence with two polyA sites); IRES, internal ribosome entry site; *Bgeo*, fusion of  $\beta$ -gal and neomycin resistance cDNA; PGK-DTR, diphtheria toxin receptor control by the PGK promoter. **(B)** Quantitative PCR analysis of *Ackr4* transcript abundance in sorted marginal zone B cells and Fo B cells ( $n = 3$  mice/genotype; gated as shown in D). Data are presented relative to the housekeeping gene *Rplp0* (means  $\pm$  SD). **(C)** CCL19 scavenging assay. Sorted Fo B cells from WT ( $n = 3$ ) or *Cd23<sup>Cre/+</sup>.Rosa26<sup>LSL-Ackr4/+</sup>* ( $n = 3$ ) mice were incubated with 10 or 5 ng/ml recombinant CCL19 for 3 h at 37°C. CCL19 concentration in cell-free supernatants was determined by ELISA. Samples with no addition of cells (chemokine only) were used to determine input CCL19 concentration. One-way ANOVA with the Bonferroni multiple comparisons test (means  $\pm$  SEM). **(D)** Representative flow cytometric analysis of marginal zone B cell (B220<sup>+</sup>CD11b<sup>-</sup>CD93<sup>-</sup>CD23<sup>lo/-</sup>CD21<sup>+</sup>) and Fo B cell (B220<sup>+</sup>CD11b<sup>-</sup>CD93<sup>-</sup>CD23<sup>+</sup>CD21<sup>lo/-</sup>) frequencies in spleen of WT ( $n = 3$ ) and *Cd23<sup>Cre/+</sup>.Rosa26<sup>LSL-Ackr4/+</sup>* ( $n = 3$ ) mice. max, maximum. **(E)** Representative flow cytometric analysis of CCR7 and CXCR5 expression on unstimulated (rested overnight) and anti-IgM-stimulated (5  $\mu$ g/ml; 24 h) WT and *Cd23<sup>Cre/+</sup>.Rosa26<sup>LSL-Ackr4/+</sup>* B cells. **(F)** Anti-IgM-stimulated (24 h) WT and *Cd23<sup>Cre/+</sup>.Rosa26<sup>LSL-Ackr4/+</sup>* B cell transwell chemotaxis to CCL21 and CXCL13 (means  $\pm$  SEM). Unpaired, two-tailed Student's *t* test. (C and F) \*,  $P < 0.05$ ; \*\*,  $P < 0.01$ ; \*\*\*,  $P < 0.001$ .
